# Supplementary material for: Hydrolysis of Soybean Milk Protein by Papain: Antioxidant, Anti-Angiotensin, Antigenic and Digestibility Perspectives
Source: MDPI journal article supplement (doi:10.3390/bioengineering9090418), 2022-08-26
Supplement: s1 [file s1]

**Figure S1**

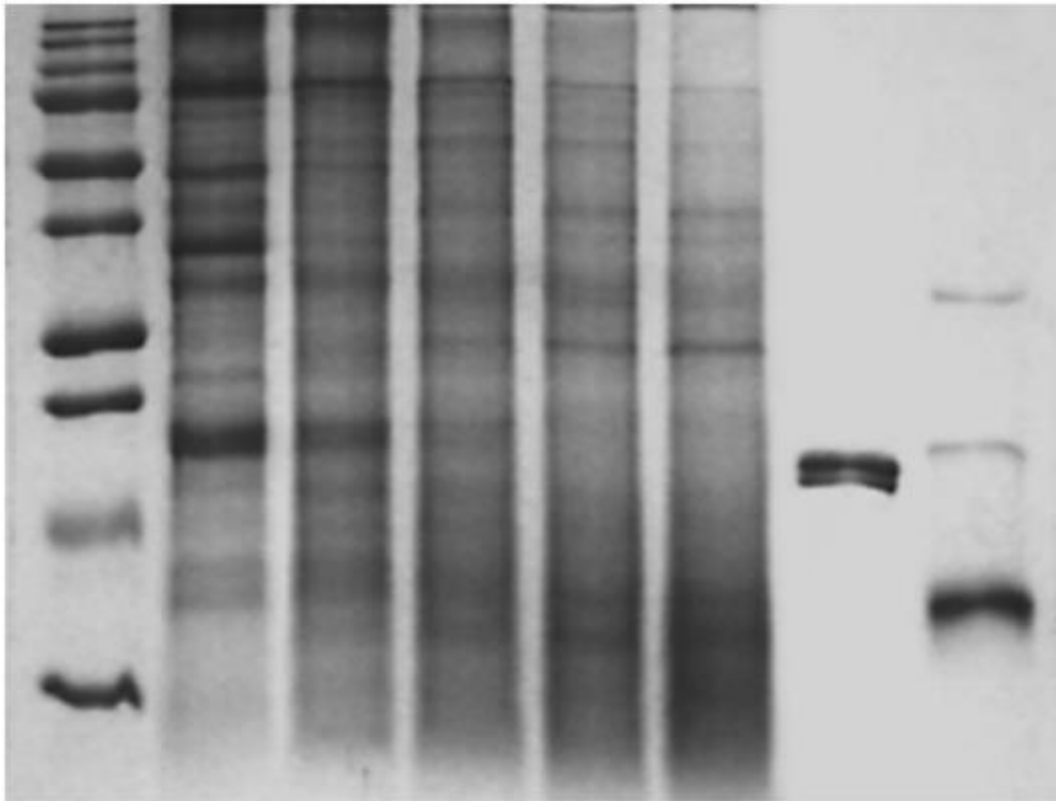

**Figure S2**

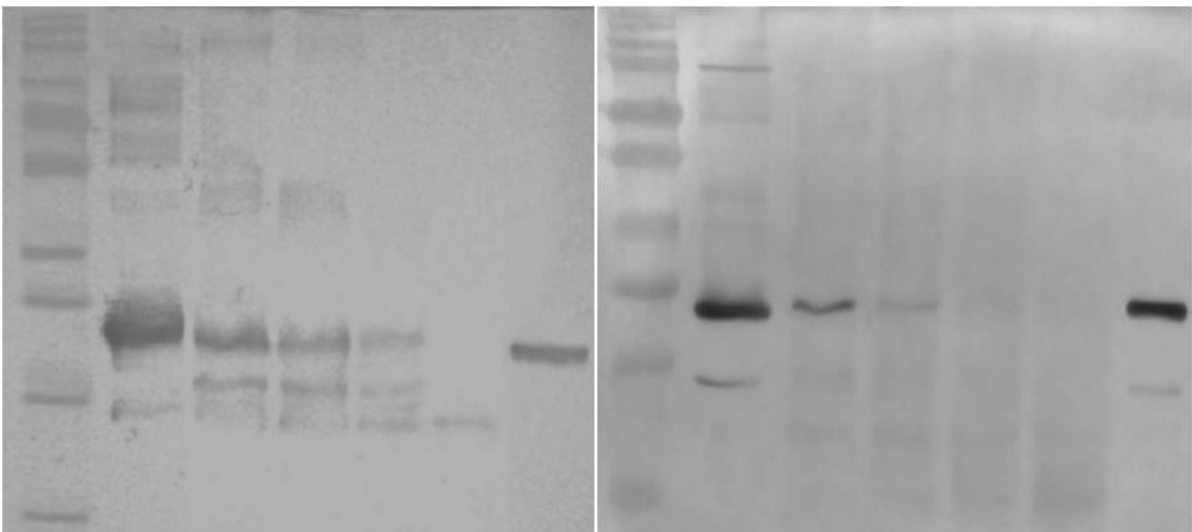

**Figure S3**

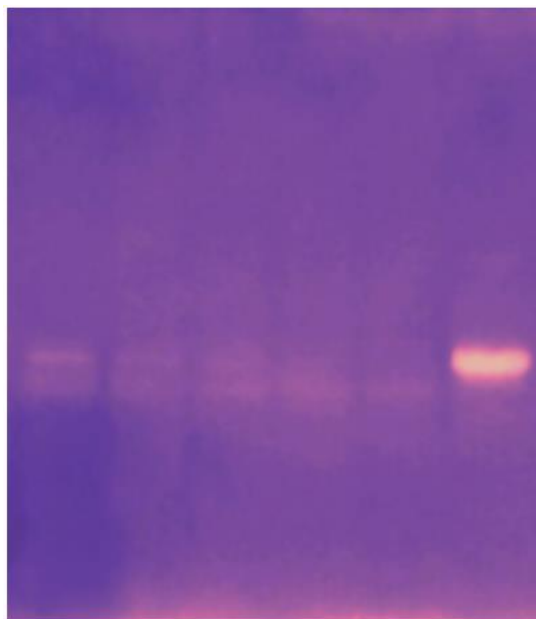

Table S1

|                  | 175 kDa   | 76 kDa    | 71 kDa    | 67 kDa    | 50 kDa    | 44 kDa    | 35 kDa    | 34 kDa    | 28 kDa    | 24 kDa    | 20 kDa    |
|------------------|-----------|-----------|-----------|-----------|-----------|-----------|-----------|-----------|-----------|-----------|-----------|
| Unhydrolyzed SMP | 23011.761 | 21173.267 | 21679.033 | 20319.196 | 24373.317 | 21957.167 | 24787.468 | 22846.803 | 20465.773 | 18948.702 | 21784.652 |
| SMP-0.008        | 21565.832 | 20288.782 | 20422.146 | 19086.196 | 19256.589 | 18709.711 | 16296.125 | 20237.418 | 20239.539 | 23171.267 | 20928.752 |
| SMP-0.016        | 15688.246 | 15929.317 | 17287.246 | 16844.004 | 15958.832 | 17684.246 | 14317.882 | 18060.711 | 20160.539 | 22294.489 | 17211.004 |
| SMP-0.032        | 8624.882  | 10163.196 | 12569.075 | 12647.196 | 11700.317 | 16062.903 | 12468.024 | 15052.146 | 18939.924 | 22438.146 | 15780.782 |
| SMP-0.064        | 2355.033  | 3026.640  | 5323.832  | 6048.397  | 6679.903  | 11754.004 | 11107.832 | 13864.974 | 17916.924 | 23621.338 | 15401.388 |

Table S1 Continue

|                  | 18 kDa    | 14 kDa    | 8 kDa     |
|------------------|-----------|-----------|-----------|
| Unhydrolyzed SMP | 27892.075 | 16034.146 | 6734.660  |
| SMP-0.008        | 22240.196 | 21817.773 | 12917.631 |
| SMP-0.016        | 17624.660 | 22230.317 | 17136.024 |
| SMP-0.032        | 14619.075 | 21577.489 | 17847.095 |
| SMP-0.064        | 14312.731 | 25761.844 | 27016.572 |
